# Supplementary material for: Effect of SQW on the bladder function of mice lacking TRPV1
Source: Springer Nature journal article supplement (doi:10.1186/s12906-016-1420-6), 2016-11-14
Supplement: MOESM1 [file 11048782]

## The quality control of Suoquanwan(SQW)

According to the Chinese Pharmacopeia, the content of linderane in SQW is required more than 0.09mg/g. And the our determination result show that the SQW we used is meet requirements.

**Tab. The content of linderane in *Suoquan pill***

| No. | Linderane(mg/g) |
|-----|-----------------|
| 1   | 0.27            |
| 2   | 0.23            |
| 3   | 0.31            |
| 4   | 0.17            |
| 5   | 0.34            |

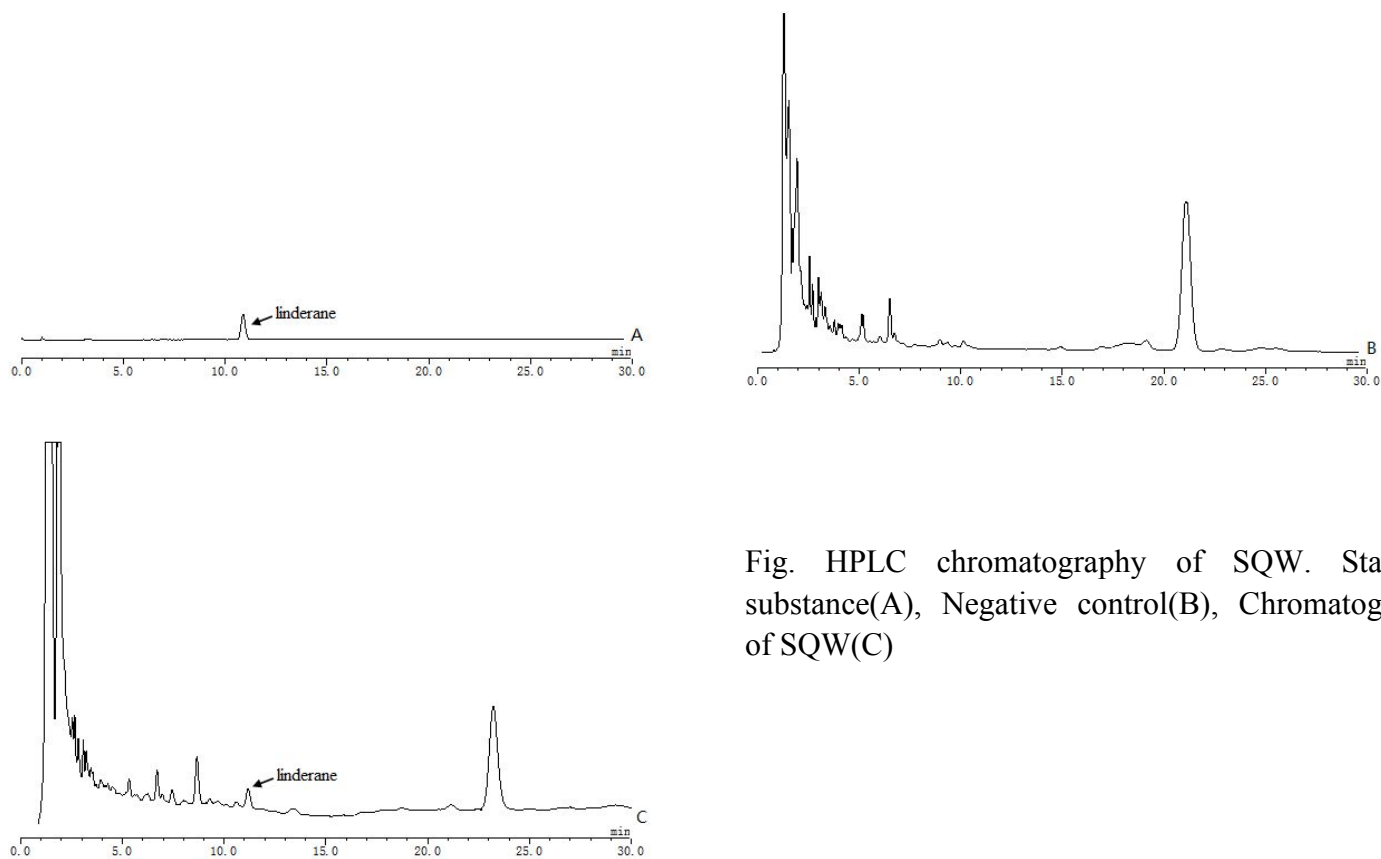

Fig. HPLC chromatography of SQW. Standard substance(A), Negative control(B), Chromatography of SQW(C)
